# Supplementary material
Source: PubMed Central journal article supplement (PMC4351962)
Supplement: NIHMS659605-supplement-1.pdf [file NIHMS659605-supplement-1.pdf]

## Supplementary Fig.1

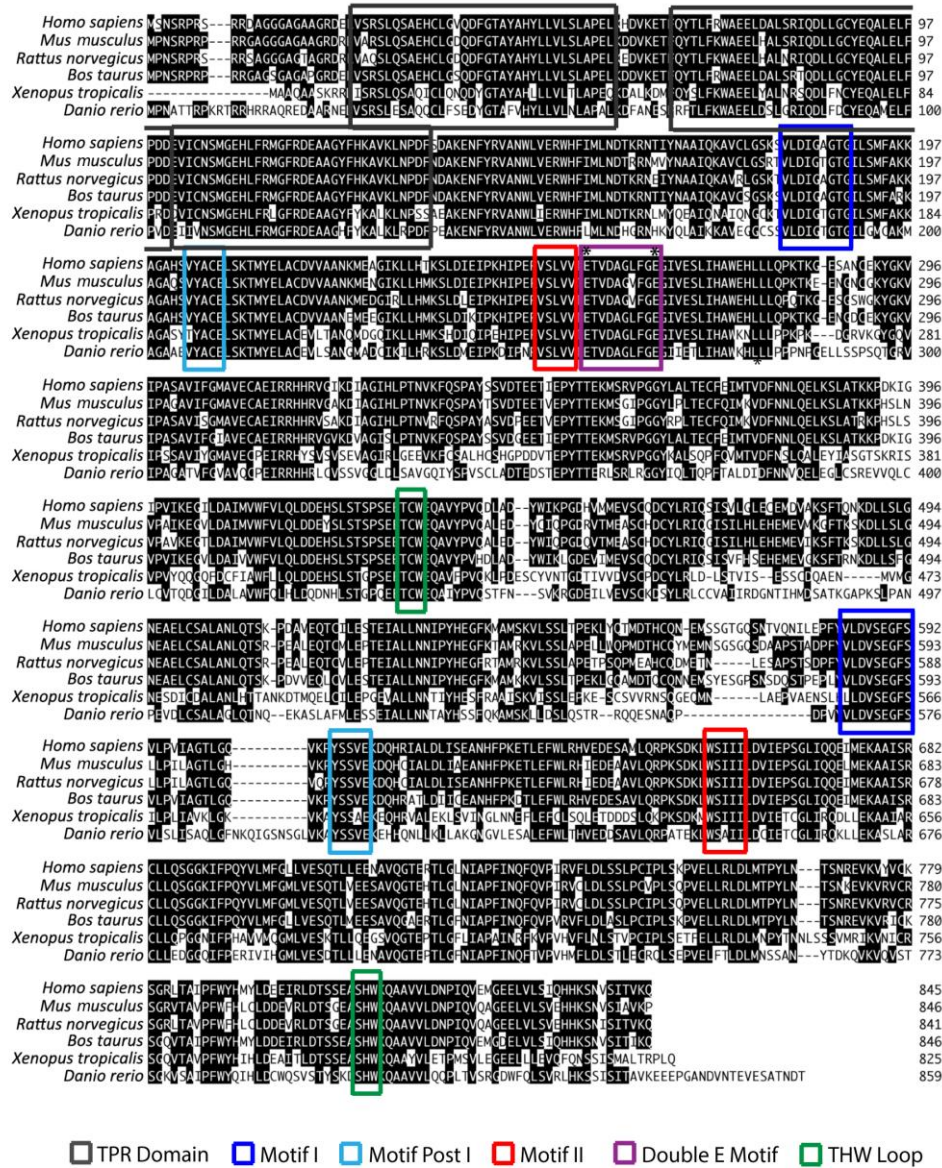

### Supplementary Fig. 1. PRMT9 is conserved among species.

Vertebrate PRMT9 protein sequences from *Danio rerio* (NP\_001124239.1), *Xenopus tropicalis* (NP\_001135658.1), *Bos taurus* (NP\_001092521.1), *Rattus norvegicus* (NP\_001178528.1), *Mus musculus* (NP\_001074709.1) and *Homo sapiens* (NP\_612373.2) were aligned by Clustal W. Colored boxes indicate the conserved protein domains/motifs that have been identified as shown at the bottom of the figure. Shaded residues are identical in multiple species.

## Supplementary Fig.2

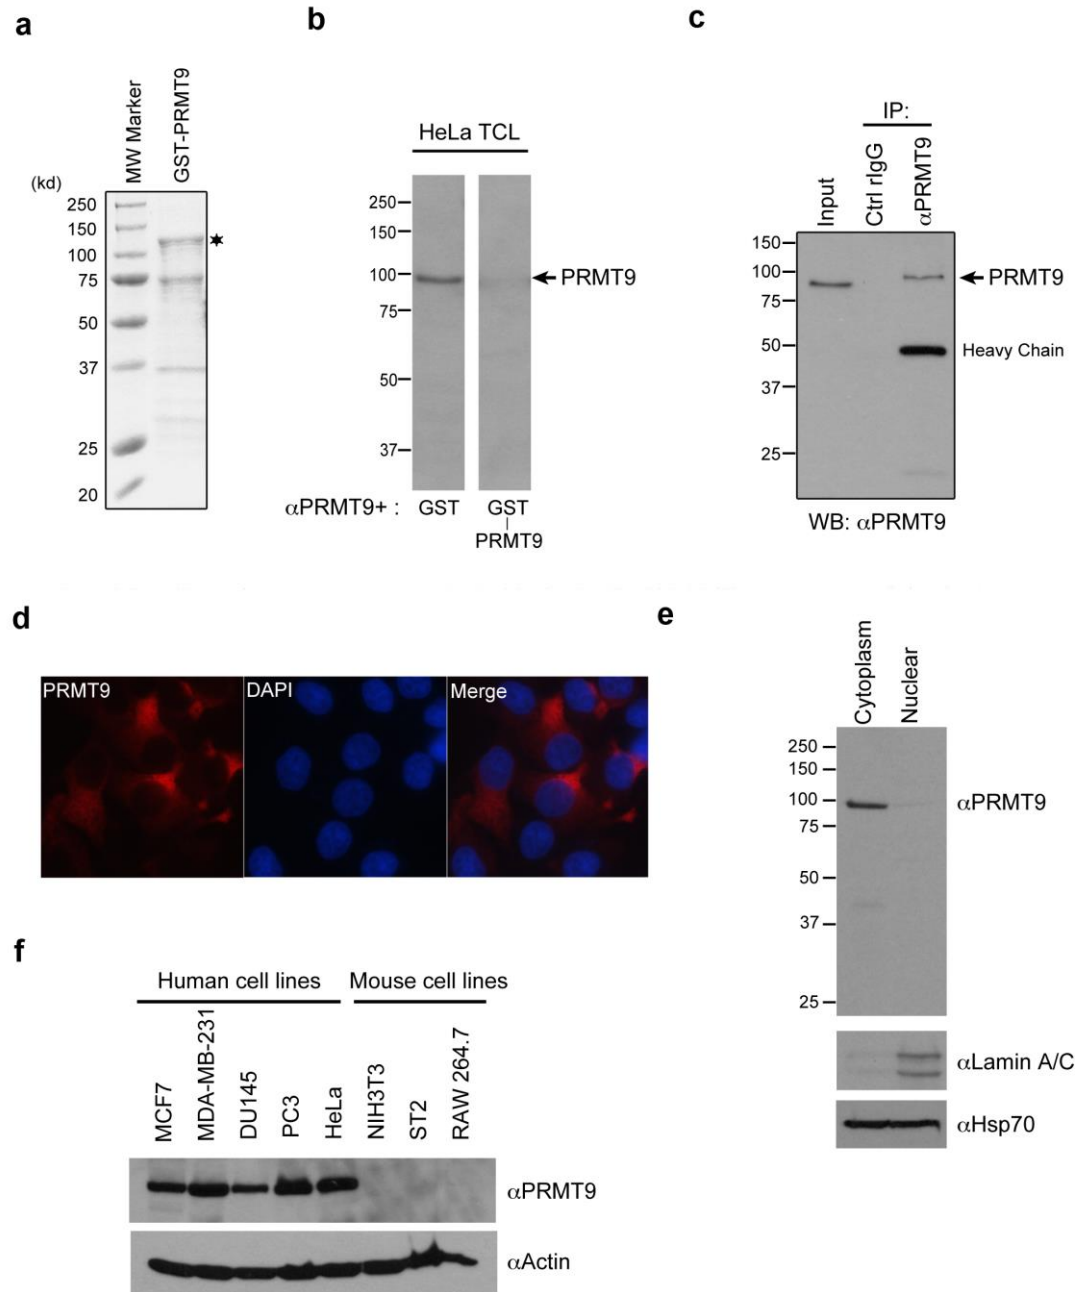

### Supplementary Fig. 2. Characterization of mouse anti-PRMT9 monoclonal antibody.

(a) Expression and purification of GST-PRMT9. Recombinant protein was loaded on SDS-PAGE gel and stained with Coomassie blue. The asterisk indicates the position of the full length GST-PRMT9 protein.

(b) Characterization of PRMT9 antibody by western blot. 30  $\mu$ g of HeLa cell lysate was loaded on SDS-PAGE gel and detected with  $\alpha$ PRMT9 antibody or  $\alpha$ PRMT9 antibody that has been neutralized by excessive amount of recombinant GST-PRMT9.

(c) Characterization of PRMT9 antibody by immunoprecipitation. 1 mg of HeLa cell lysate protein was immunoprecipitated with either rabbit control IgG or  $\alpha$ PRMT9 antibody. The eluted samples were run on SDS-PAGE gel and detected by western blot using  $\alpha$ PRMT9 antibody.

(d) Determination of PRMT9 subcellular localization by immunofluorescence. Immunofluorescence was performed in HeLa cells using  $\alpha$ PRMT9 antibody at 1:1000 dilution, showing predominant cytoplasmic localization of endogenous PRMT9. DAPI staining indicates the nucleus.

(e) PRMT9 mainly localizes in cytoplasm. Western blot of cytoplasmic and nuclear fractions of HeLa cells were probed with  $\alpha$ PRMT9 monoclonal antibody, showing cytoplasmic localization of PRMT9. Lamin A/C expression is used as a marker of the nucleus.

(f) PRMT9 monoclonal antibody does not cross react with mouse PRMT9 protein. Total cell lysates from a panel of human cancer cell lines and mouse cell lines were detected for PRMT9 expression by western blotting. Results from both long and short exposure were shown.  $\alpha$ Actin blotting was shown as loading controls.

### Supplementary Fig.3

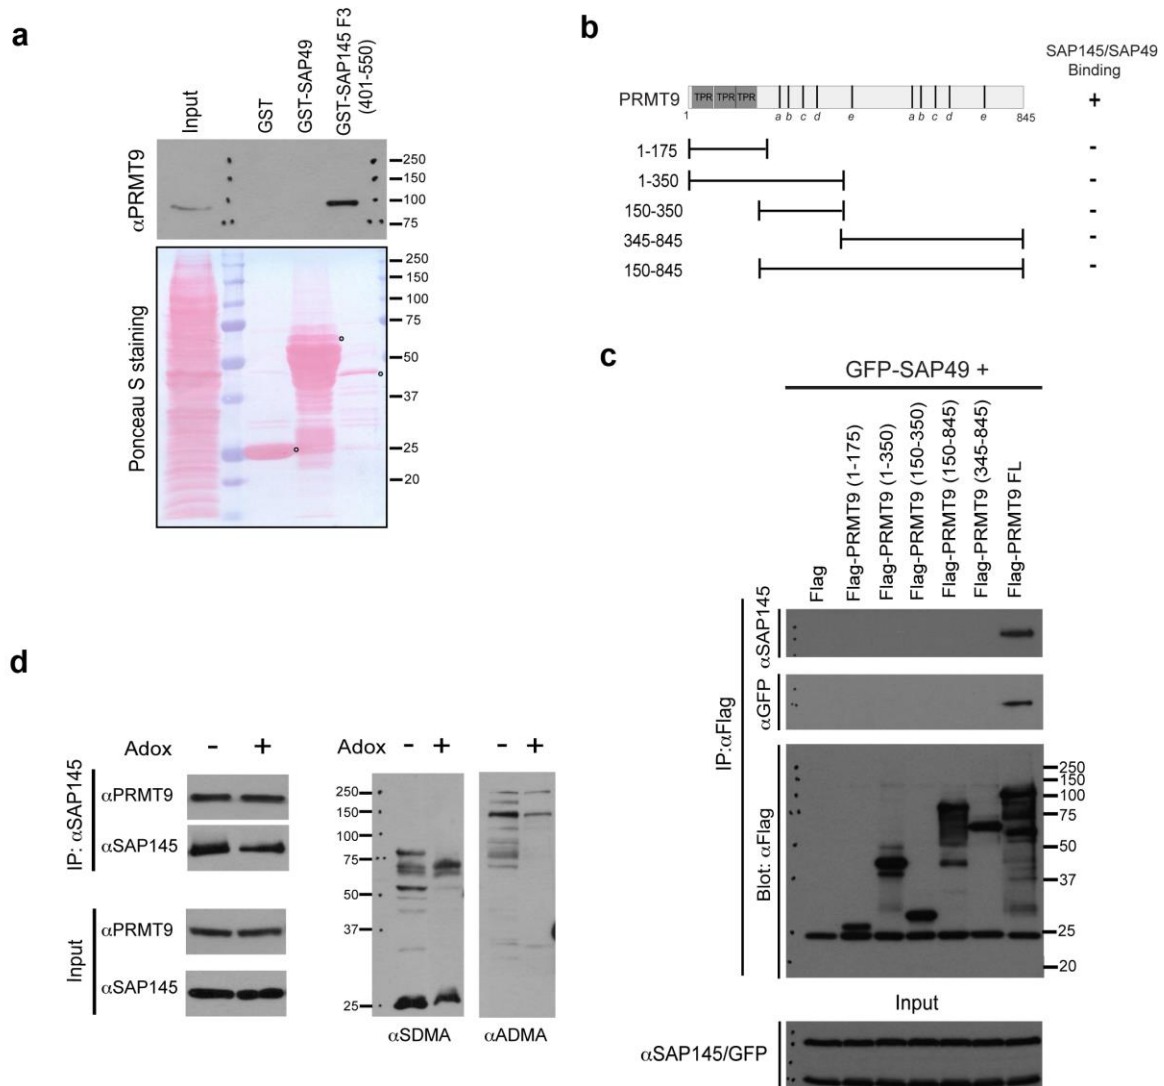

### Supplementary Fig. 3. Further characterization of PRMT9-SAP145 interaction.

(a) SAP145, but not SAP49, interacts with PRMT9 directly. GST pull-down experiment was performed by incubating HeLa cell lysates with purified GST, GST-tag SAP49 and GST-SAP145 fragments F3. The pull-down samples were eluted and detected by western blotting using  $\alpha$ PRMT9 antibody. The open circles indicate the positions of individual GST-tag proteins.

(b) A series of Flag-fusion truncations of PRMT9 were generated. The locations of the TPR domains and the identified motifs in methyltransferase domain are indicated. The graphic summary of the interactions observed in (c) is shown. a-e indicate signature PRMT motifs: a,

Motif I: VLD/EVGXGXG; b, Post I: V/IXG/AXD/E; c, Motif II: F/I/VDI/L/K; d, Motif III: LR/KXXG; e, THW loop.

(c) A coIP assay was performed in HeLa cells transfected with the different PRMT9 Flag-fusion vectors and GFP-SAP49. The cell lysates were immunoprecipitated with  $\alpha$ Flag antibody and eluted samples were blotted with  $\alpha$ GFP,  $\alpha$ SAP145 and  $\alpha$ Flag. Total cell lysates were detected with both  $\alpha$ GFP and  $\alpha$ SAP145 as input controls.

(d) Inhibition of methylation by AdOx does not affect PRMT9-SAP145 interaction. HeLa cells were treated with 20  $\mu$ M of AdOx for 6 days before the immunoprecipitation was performed with the  $\alpha$ SAP145 antibody. The eluted samples were detected with  $\alpha$ SAP145 and  $\alpha$ PRMT9 antibodies.

## Supplementary Fig.4

a

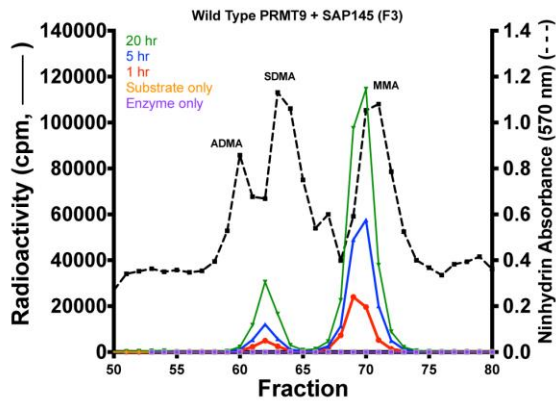

b

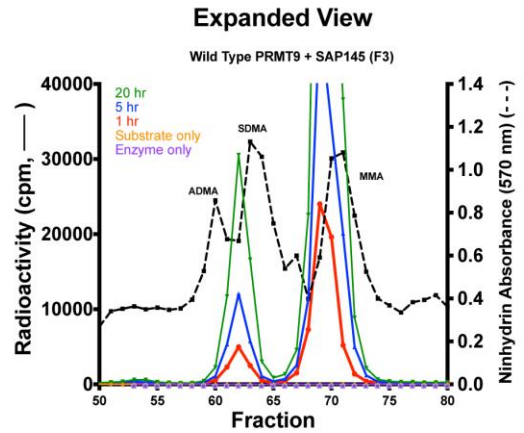

### Supplementary Fig. 4. PRMT9 catalyzes symmetrical dimethylation of SAP145 *in vitro*.

(a) PRMT9 symmetrically dimethylates SAP145 as analyzed by time-course amino acid analysis. Amino acid analysis of *in vitro* methylation products from three different time-course (1, 5 and 20 h) using GFP-PRMT9 as enzyme and GST-SF3B2 (401-550) fragment as substrate. Black dashed line indicates elution of nonradiolabeled standards. The radioactive peaks elute 1-2 min before the nonradiolabeled standards due to a tritium isotope effect <sup>39</sup>. (b) Expanded view of the amino acid analysis results from (a).

## Supplementary Fig.5

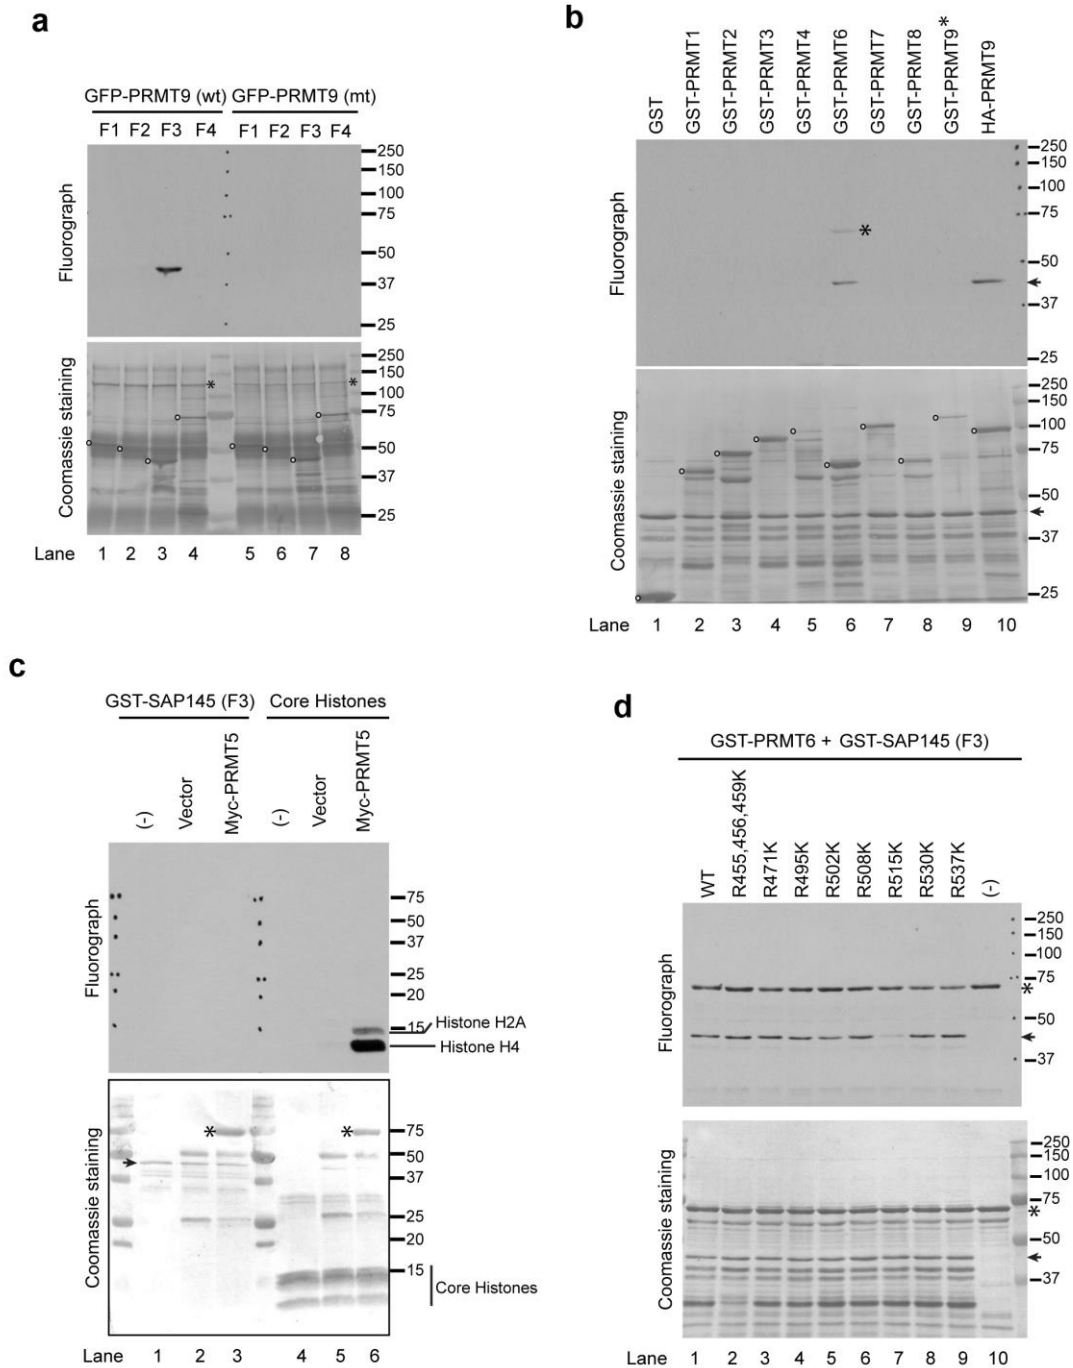

### Supplementary Fig. 5. PRMT9 methylates SAP145 in vitro.

(a) PRMT9 methylates SAP145 fragment F3 (a.a. 401-550). The *in vitro* methylation assay was performed by incubating either wild type or enzymatic mutant GFP-PRMT9 (immunoprecipitated from HeLa cell lysates) with GST and GST-tag SAP145 fragments (F1- F4, as described in Fig.



**3a,b).** The reaction samples were run on a SDS-PAGE gel followed by exposure to x-ray film for 3 days. The membrane was then stained with Coomassie blue. The open circles indicate the substrates and the stars indicate the immunoprecipitated enzymes.

**(b)** In addition to PRMT9, PRMT6 can also methylate SAP145 *in vitro*. *In vitro* methylation was performed by incubating GST-tag recombinant enzymes and SAP145 fragment F3. HA-PRMT9 purified from sf21 cells was used as a positive control. GST-PRMT9 is inactive under these conditions. Coomassie blue staining displays the loading of the recombinant GST-tag enzymes (open circles) and substrates (arrow). The star on the fluorograph indicates the GST-PRMT6 automethylation signal.

**(c)** PRMT5 does not methylate SAP145. *In vitro* methylation was performed by incubating immunoprecipitated Myc-tag PRMT5 with either GST-SAP145 fragment F3 or purified core histones (positive control). In contrast to methylating Histone H2A and H4, PRMT5 does not methylate SAP145 fragment F3.

**(d)** Arginine 515 of SAP145 is methylated by PRMT6 *in vitro*. *In vitro* methylation assay was performed by incubating recombinant GST-PRMT6 with a series of Arg to Lys (R to K) mutants of SAP145 fragment F3 (see **Fig. 3a,b** for description). After exposure, the membrane was stained with coomassie blue to check the protein loading. Arrows indicate the positions of the substrates and stars indicate the position of the recombinant GST-PRMT6. Star on the fluorograph indicate the PRMT6 automethylation signals.



## Supplementary Fig.6

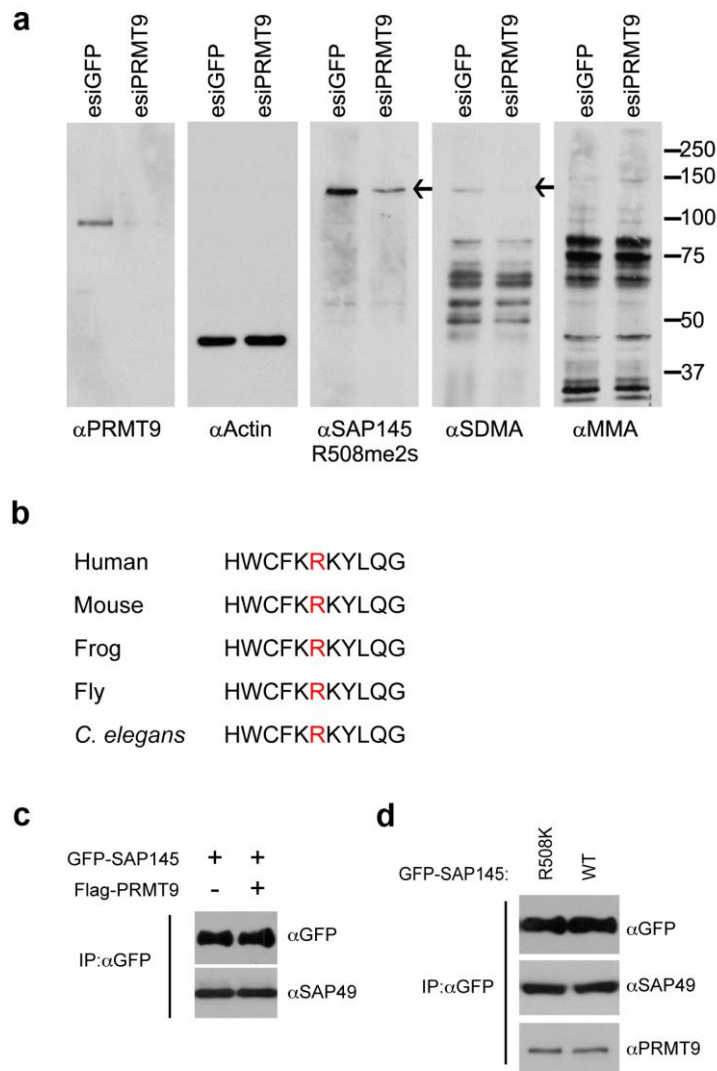

### Supplementary Fig. 6. R508 methylation does not affect SAP145 interaction with SAP49 or PRMT9.

(a) Knockdown of PRMT9 decreases SAP145 R508 symmetrical dimethylation. HeLa cells were transiently transfected with either control esiGFP (esiRNA targeting GFP) or esiPRMT9 (esiRNA targeting PRMT9) for 48 hours. 30  $\mu$ g of total cell lysates were subjected to western blotting and detected with  $\alpha$ PRMT9,  $\alpha$ Actin,  $\alpha$ SAP145 R508me2s,  $\alpha$ SDMA, and  $\alpha$ MMA antibodies. Arrows indicate the detection of SAP145 symmetrical dimethylation by  $\alpha$ SAP145 R508me2s and  $\alpha$ SDMA antibodies.

(b) Arginine 508 site of SAP145 is evolutionarily conserved among species. The conserved arginine is marked in red.

(c) Overexpression of PRMT9 does not affect SAP145-SAP49 interaction. Same immunoprecipitated samples as described in **Fig. 5d** were detected with  $\alpha$ SAP49 antibody, by western blotting.

(d) SAP145 arginine methylation deficient mutant (R508K) can still interact with SAP49 and PRMT9. Same total cell lysates as described in **Fig. 5c** were immunoprecipitated with  $\alpha$ GFP antibody, followed by western blotting with  $\alpha$ GFP,  $\alpha$ SAP49 and  $\alpha$ PRMT9 antibodies.

## Supplementary Fig.7

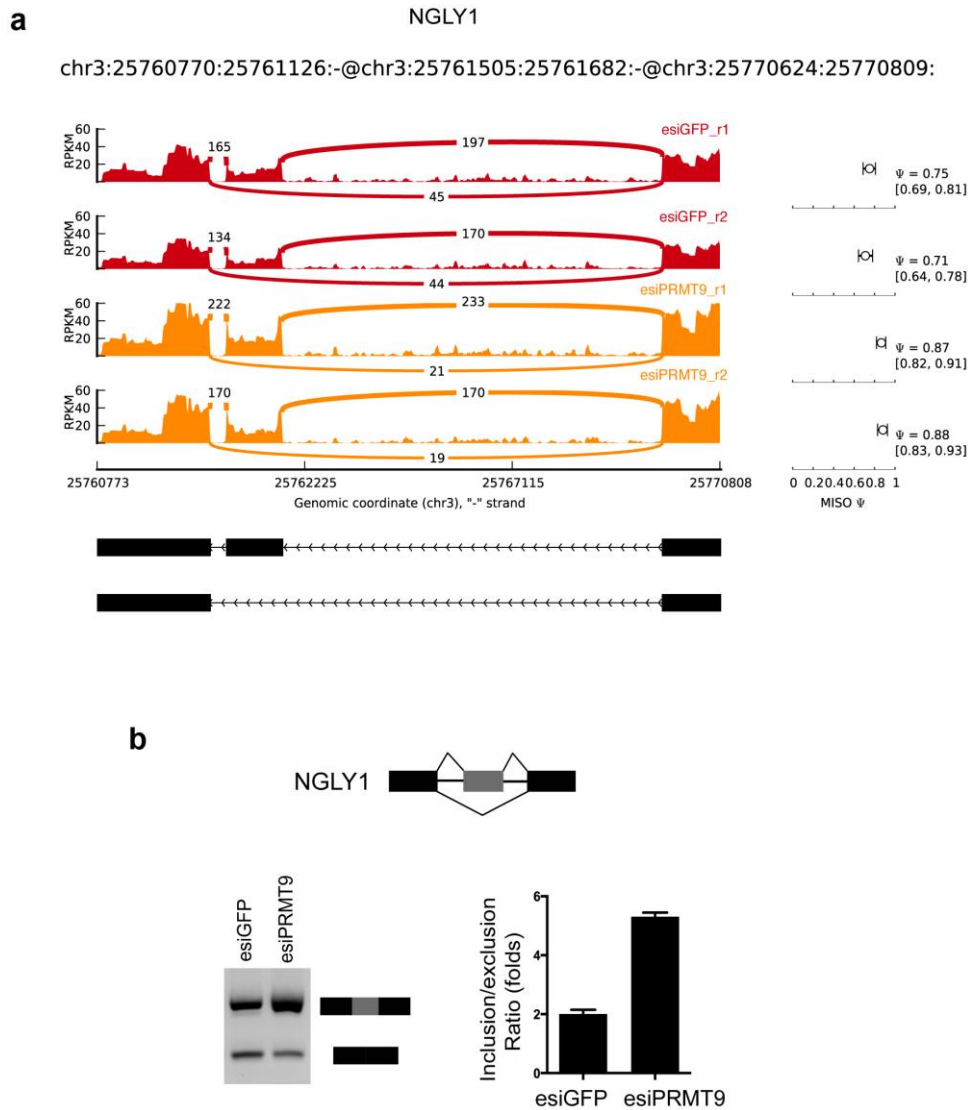

### Supplementary Fig. 7. NGLY1 alternative splicing is regulated by PRMT9.

(a) RNA-seq read coverage across NGLY1 exon 10 to exon 12 from esiGFP control and esiPRMT9 knockdown HeLa cells. MISO PSI ( $\Psi$ ) values and 95% confidence intervals were shown at right.

(b) Validation of exon exclusion of NGLY1 exon 11 in response to PRMT9 knockdown. RT-PCR experiments were performed using RNA extracted from esiGFP control and esiPRMT9 transfected HeLa cells with primers located on exon 10 and exon 12 (left panel). The PCR products were quantified by densitometric analysis. Inclusion vs exclusion ratio was calculated. Error bars represent standard deviation calculated from three independent experiments (right panel).

Supplementary Fig. 8 Full blots for figures in the main text

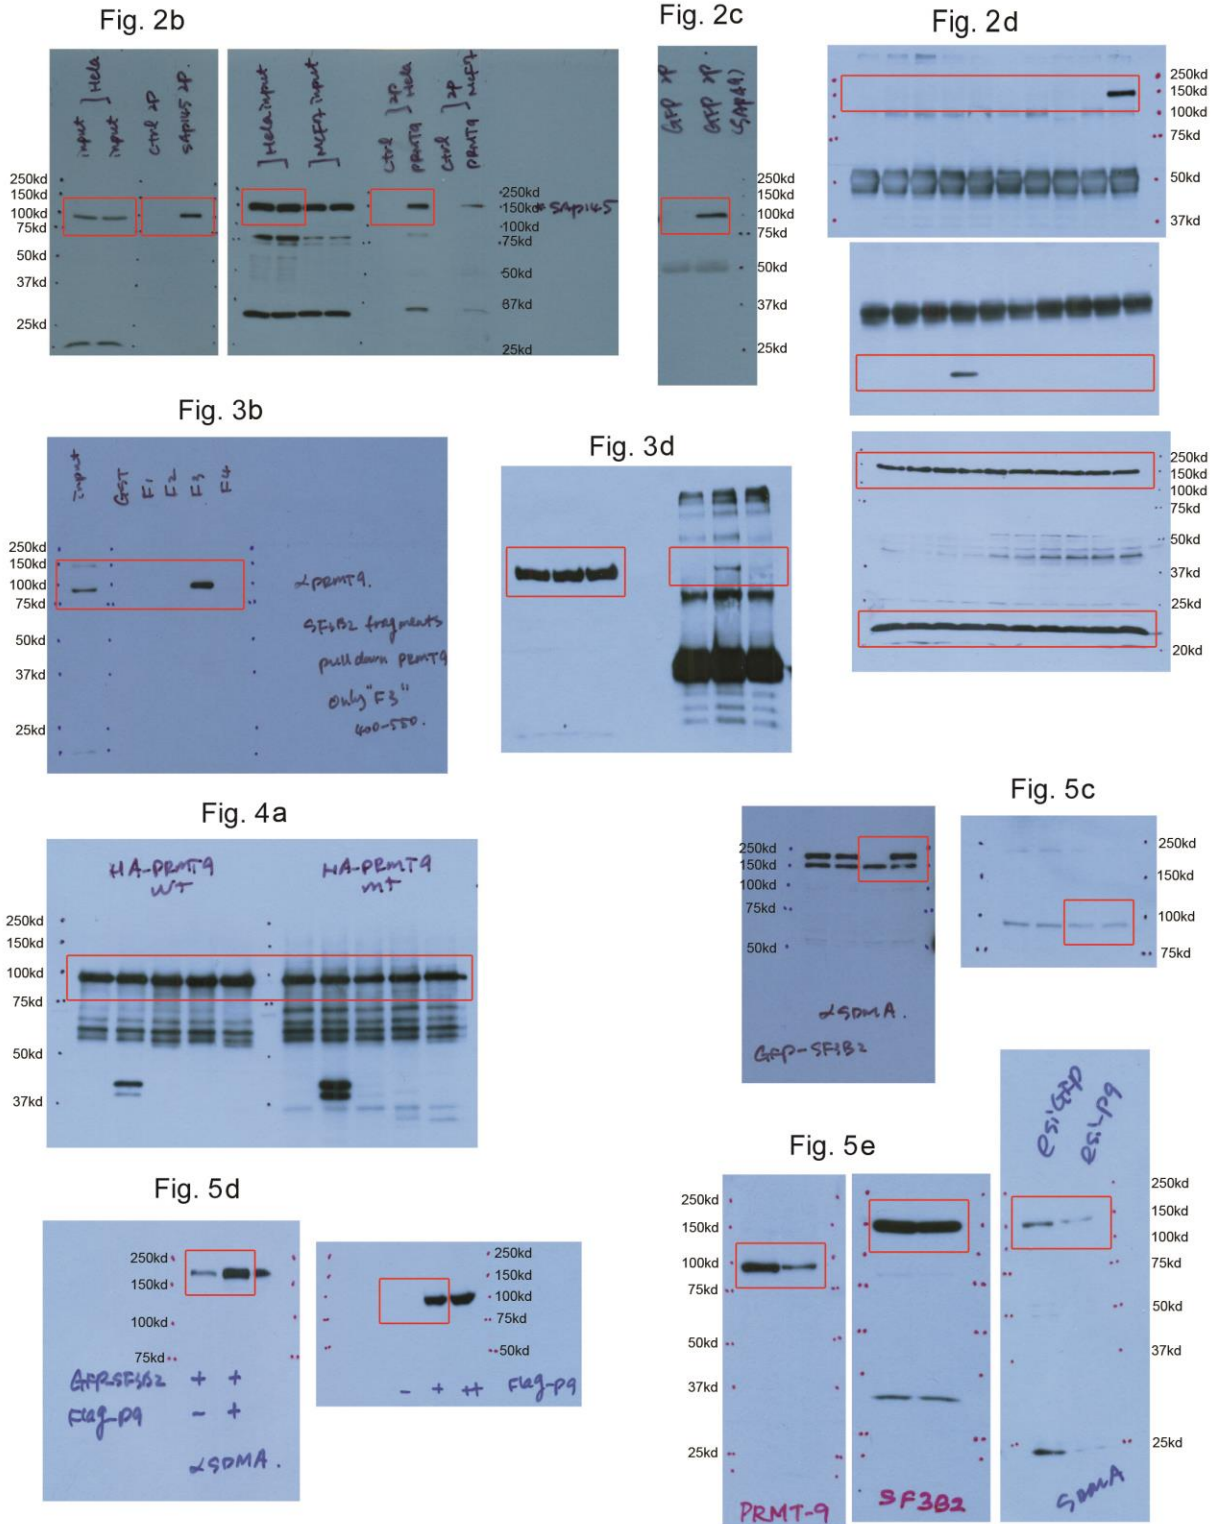

Supplementary Fig. 8 Full blots for figures in the main text, continued

Fig. 6a

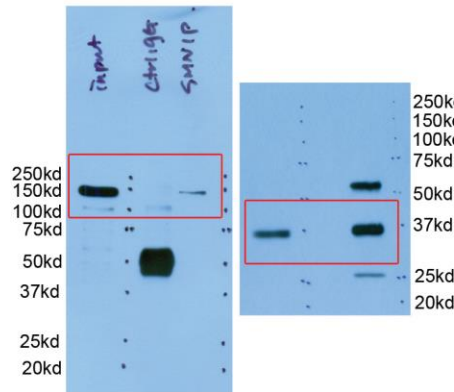

Fig. 6b

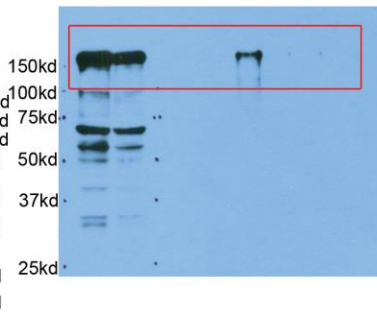

Fig. 6c

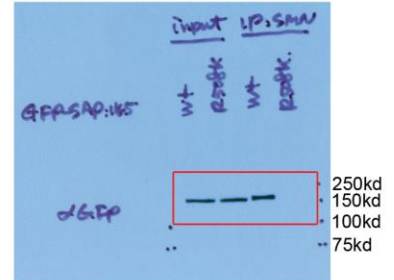

Fig. 6d

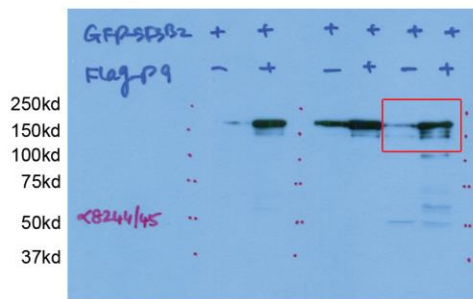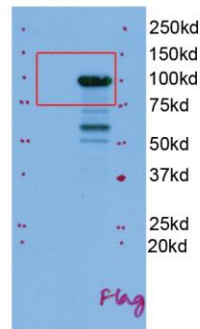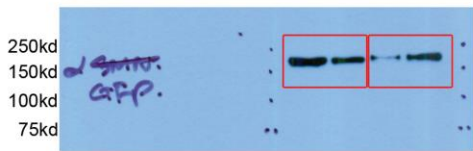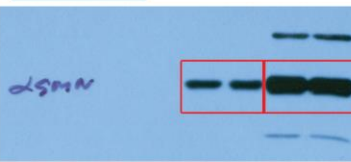

Fig. 6e

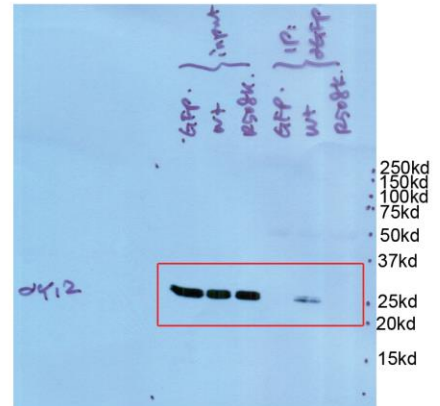

Fig. 7a

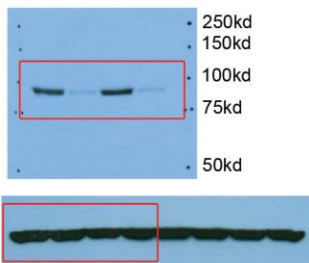

Fig. 7c

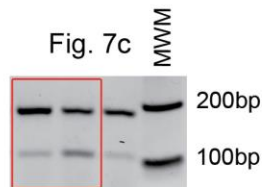

**Table 1. PRMT9 regulated alternative splicing identified by RNA-Seq**

| <b>type</b> | <b>gene</b>    | <b>loci</b>              | <b>Mean-PSI esiGFP</b> | <b>Mean-PSI esiPRMT9</b> | <b>PSI-Diff</b> | <b>Mean-BF</b> |
|-------------|----------------|--------------------------|------------------------|--------------------------|-----------------|----------------|
| MXE         | SNHG6          | chr8:67834349-67837672   | 0.39                   | 0.465                    | -0.075          | 7.57633E+11    |
| MXE         | PSMA6;KIAA0391 | chr14:35779946-35786682  | 0.55                   | 0.64                     | -0.09           | 1448263.703    |
| MXE         | UQCRB          | chr8:97243360-97244002   | 0.205                  | 0.505                    | -0.3            | 5.55212E+11    |
| A3SS        | NUSAP1;NA      | chr15:41641296-41643327  | 0.76                   | 0.865                    | -0.105          | 6345745.785    |
| A3SS        | PKD1           | chr16:2155323-2155866    | 0.09                   | 0.24                     | -0.15           | 3384.29        |
| A3SS        | SERBP1         | chr1:67889883-67890571   | 0.255                  | 0.345                    | -0.09           | 2.50103E+11    |
| A3SS        | GNB2L1         | chr5:180663929-180665099 | 0.43                   | 0.555                    | -0.125          | 5.00119E+11    |
| A3SS        | TRIM41         | chr5:180659659-180660763 | 0.35                   | 0.79                     | -0.44           | 12.0125        |
| A3SS        | PRICKLE4;TOMM6 | chr6:41756970-41757634   | 0.265                  | 0.365                    | -0.1            | 1254817028     |
| A3SS        | WSB1           | chr17:25633808-25636298  | 0.615                  | 0.855                    | -0.24           | 2.50032E+11    |
| A3SS        | CELF1          | chr11:47487489-47493743  | 0.56                   | 0.715                    | -0.155          | 5E+11          |
| A3SS        | LINC00473      | chr6:166362743-166401017 | 0.22                   | 0.15                     | 0.07            | 4598939182     |
| A5SS        | BACE2          | chr21:42613746-42615437  | 0.825                  | 0.71                     | 0.115           | 7.50194E+11    |
| A5SS        | SNORD101;RPS12 | chr6:133136111-133137702 | 0.245                  | 0.455                    | -0.21           | 1.00E+12       |
| A5SS        | RPL12          | chr9:130213083-130213684 | 0.015                  | 0.075                    | -0.06           | 1.00E+12       |
| A5SS        | PABPC4         | chr1:40035674-40037021   | 0.06                   | 0.17                     | -0.11           | 4464592.685    |
| A5SS        | OCIAD1         | chr4:48853823-48863834   | 0.385                  | 0.63                     | -0.245          | 139017439.4    |
| A5SS        | IFI35          | chr17:41165284-41165679  | 0.935                  | 0.62                     | 0.315           | 60.6475        |
| A5SS        | PARK7          | chr1:8021714-8022935     | 0.405                  | 0.54                     | -0.135          | 2.50634E+11    |
| A5SS        | SLC25A3        | chr12:98989211-98991813  | 0.07                   | 0.205                    | -0.135          | 1166477.268    |
| A5SS        | OCIAD1         | chr4:48853823-48863834   | 0.37                   | 0.61                     | -0.24           | 2.50004E+11    |
| RI          | NONO           | chrX:70517686-70518358   | 0.055                  | 0.13                     | -0.075          | 3.10669E+11    |
| RI          | KDM3A          | chr2:86718264-86719839   | 0.165                  | 0.07                     | 0.095           | 2.5001E+11     |
| RI          | NDUFS2         | chr1:161183654-161184184 | 0.07                   | 0.19                     | -0.12           | 1.00E+12       |

|             |              |                          |                        |                          |                 |                |
|-------------|--------------|--------------------------|------------------------|--------------------------|-----------------|----------------|
| RI          | HLTF         | chr3:148747904-148750159 | 0.7                    | 0.605                    | 0.095           | 5E+11          |
| RI          | RABGGTB      | chr1:76255637-76255959   | 0.55                   | 0.35                     | 0.2             | 2.5222E+11     |
| RI          | EEF1A1       | chr6:74227753-74228333   | 0.055                  | 0.135                    | -0.08           | 2.50334E+11    |
| RI          | NDUFS2       | chr1:161183654-161184185 | 0.07                   | 0.19                     | -0.12           | 1.00E+12       |
| RI          | TAF1D        | chr11:93469860-93470405  | 0.15                   | 0.095                    | 0.055           | 5.32578E+11    |
| RI          | TGFBI        | chr5:135382024-135382704 | 0.1                    | 0.235                    | -0.135          | 214098.83      |
| RI          | SLC25A3      | chr12:98987753-98989626  | 0.07                   | 0.17                     | -0.1            | 1.00E+12       |
| RI          | KDM3A        | chr2:86716643-86718180   | 0.19                   | 0.1                      | 0.09            | 218490.055     |
| RI          | DDX39B       | chr6:31500557-31503262   | 0.225                  | 0.365                    | -0.14           | 23193.6125     |
| RI          | FAM200B      | chr4:15687859-15692070   | 0.715                  | 0.525                    | 0.19            | 156691493.3    |
| <b>type</b> | <b>gene</b>  | <b>loci</b>              | <b>Mean-PSI esiGFP</b> | <b>Mean-PSI esiPRMT9</b> | <b>PSI-Diff</b> | <b>Mean-BF</b> |
| SE          | PDK1         | chr2:173431584-173435552 | 0.625                  | 0.415                    | 0.21            | 5E+11          |
| SE          | EIF4A2       | chr3:186505592-186507685 | 0.35                   | 0.28                     | 0.07            | 5E+11          |
| SE          | RPL5         | chr1:93299102-93300470   | 0.01                   | 0.06                     | -0.05           | 8.96759E+11    |
| SE          | ESYT2        | chr7:158542414-158552177 | 0.61                   | 0.485                    | 0.125           | 84.8075        |
| SE          | BCOR         | chrX:39930412-39931602   | 0.63                   | 0.5                      | 0.13            | 6.80036E+11    |
| SE          | RPS18        | chr6:33240405-33243660   | 0.1                    | 0.325                    | -0.225          | 2.53345E+11    |
| SE          | AKAP13       | chr15:86198648-86207986  | 0.37                   | 0.15                     | 0.22            | 129547714.9    |
| SE          | WAC          | chr10:28879649-28897360  | 0.905                  | 0.965                    | -0.06           | 5E+11          |
| SE          | KRAS         | chr12:25362845-25378548  | 0.11                   | 0.045                    | 0.065           | 1689.9475      |
| SE          | C17orf76-AS1 | chr17:16342641-16343567  | 0.21                   | 0.315                    | -0.105          | 5E+11          |
| SE          | UGP2         | chr2:64068098-64083567   | 0.26                   | 0.43                     | -0.17           | 11751.8175     |
| SE          | TRMU         | chr22:46733676-46742441  | 0.65                   | 0.44                     | 0.21            | 1723.5925      |
| SE          | FLNB         | chr3:58116468-58118658   | 0.495                  | 0.22                     | 0.275           | 39.075         |
| SE          | BAG1         | chr9:33261167-33262700   | 0.06                   | 0.15                     | -0.09           | 2.52386E+11    |
| SE          | HNRPDL       | chr4:83346036-83347190   | 0.54                   | 0.845                    | -0.305          | 1.00E+12       |
| SE          | CD44         | chr11:35240863-35253949  | 0.865                  | 0.945                    | -0.08           | 1104.3325      |
| SE          | PIKFYVE      | chr2:209138308-          | 0.62                   | 0.33                     | 0.29            | 54.435         |



|    |              |                           |       |       |        |             |
|----|--------------|---------------------------|-------|-------|--------|-------------|
|    |              | 209150657                 |       |       |        |             |
| SE | NIN          | chr14:51221585-51226575   | 0.49  | 0.33  | 0.16   | 342993.52   |
| SE | AL590482.1   | chr6:166354254-166401017  | 0.56  | 0.79  | -0.23  | 1.00E+12    |
| SE | AL590482.1   | chr6:166354254-166401017  | 0.455 | 0.565 | -0.11  | 2777.1425   |
| SE | WARS         | chr14:100835595-100842597 | 0.355 | 0.735 | -0.38  | 71.2425     |
| SE | KTN1         | chr14:56139647-56142636   | 0.385 | 0.235 | 0.15   | 7.50002E+11 |
| SE | UQCRB        | chr8:97243360-97244002    | 0.1   | 0.255 | -0.155 | 5.01733E+11 |
| SE | C17orf76-AS1 | chr17:16342641-16343567   | 0.155 | 0.265 | -0.11  | 5.05874E+11 |
| SE | EEF1B2       | chr2:207025312-207026196  | 0.05  | 0.305 | -0.255 | 1.00E+12    |
| SE | C17orf76-AS1 | chr17:16342641-16343567   | 0.22  | 0.31  | -0.09  | 5.00005E+11 |
| SE | SH3D19       | chr4:152065202-152069074  | 0.11  | 0.035 | 0.075  | 11052.275   |
| SE | EDEM1        | chr3:5249778-5252983      | 0.82  | 0.605 | 0.215  | 3825.795    |
| SE | PTP4A2       | chr1:32384848-32403643    | 0.22  | 0.355 | -0.135 | 356.8325    |
| SE | EEF1D        | chr8:144672000-144679585  | 0.315 | 0.635 | -0.32  | 655.545     |
| SE | ATP13A3      | chr3:194123406-194134568  | 0.58  | 0.465 | 0.115  | 3950496.895 |
| SE | NGLY1        | chr3:25760770-25770809    | 0.73  | 0.875 | -0.145 | 96.065      |
| SE | DCAF6        | chr1:167973771-168012378  | 0.965 | 0.76  | 0.205  | 7.69542E+11 |
| SE | MON2         | chr12:62959017-62960230   | 0.775 | 0.435 | 0.34   | 135.3625    |
